# Supplementary material for: Malleable Machines in Transcription Regulation: The Mediator Complex
Source: PubMed Central journal article supplement (PMC2588115; doi:10.1371/journal.pcbi.1000243), 2008-12-19

Figure S3

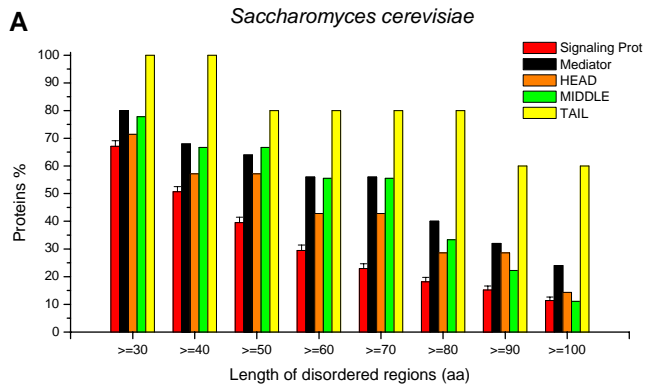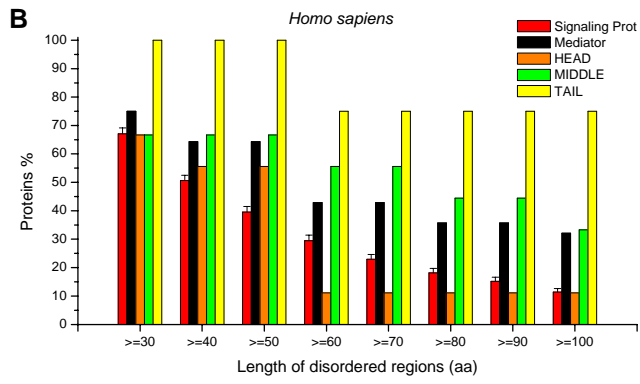

Supplement: pcbi.1000243.s003.pdf [file pcbi.1000243.s003.pdf]
