# Supplementary material for: Malleable Machines in Transcription Regulation: The Mediator Complex
Source: PLoS Comput Biol. 2008 Dec 19;4(12):e1000243. doi: 10.1371/journal.pcbi.1000243 (PMC2588115; doi:10.1371/journal.pcbi.1000243)
Supplement: Table S1 — Sequences of Mediator subunits in the MED_ALSEQ database. Uniprot or NCBI codes are reported. Sequences, which were obtained as the Supplementary material of the reference [21] (and no corresponding sequences are found in Uniprot or NCBI by BLAST search), are marked by their reference number. (0.06 MB XLS) [file pcbi.1000243.s007.xls]

## Sheet: allid
MEDIATOR SEQUENCE DATABASE
	Subunit	Organism	NCBI	SwissProt	Ref	Module
1	Med1	Argia fumigata			[21]	MIDDLE
2	Med1	Arabidopsis thaliana	NP_567993.1			MIDDLE
3	Med1	Candida albicans	XP_721072.1			MIDDLE
4	Med1	Caenorhabditis elegans	NP_740821.1			MIDDLE
5	Med1	Candida glabrata	XP_445475.1			MIDDLE
6	Med1	Drosophila melanogaster	NP_649341.1			MIDDLE
7	Med1	Homo sapiens		Q15648		MIDDLE
8	Med1	Mus musculus	NP_001073587.1			MIDDLE
9	Med1	Neurospora crassa	XP_960971.1			MIDDLE
10	Med1	Saccharomyces cerevisiae	NP_015395.1	Q12321		MIDDLE
11	Med1	Saccharomyces pombe	NP_592975.1	Q09696		MIDDLE
12	Med2	Ashbya gossypii	NP_984852.1			TAIL
13	Med2	Candida albicans	XP_709999.1			TAIL
14	Med2	Candida glabrata	XP_445370.1			TAIL
15	Med2	Dictyostelium discoideum	XP_644037.1			TAIL
16	Med2	Danio rero	NP_001025251.1			TAIL
17	Med2	Kluyveromyces lactis	XP_455743.1			TAIL
18	Med2	Rattus norvegicus	XP_001080602.1			TAIL
19	Med2	Saccharomyces cerevisiae	NP_010279.1	Q12124		TAIL
20	Med3	Ashbya gossypii	NP_986033.1			TAIL
21	Med3	Candida glabrata	XP_444828.1			TAIL
22	Med3	Dictyostelium discoideum	XP_640661.1			TAIL
23	Med3	Drosophila melanogaster	NP_651853.1			TAIL
24	Med3	Homo sapiens	NP_061187.2			TAIL
25	Med3	Kluyveromyces lactis	XP_454430.1			TAIL
26	Med3	Rattus norvegicus	XP_001063898.1			TAIL
27	Med3	Saccharomyces cerevisiae		P40356		TAIL
28	Med4	Argia fumigata	XP_751265.1			MIDDLE
29	Med4	Arabidopsis thaliana	NP_195905.1			MIDDLE
30	Med4	Bos taurus	XP_593297.2			MIDDLE
31	Med4	Candida albicans	XP_713181.1			MIDDLE
32	Med4	Caenorhabditis elegans		Q7Z144		MIDDLE
33	Med4	Canis familiaris	XP_854517.1			MIDDLE
34	Med4	Candida glabrata	XP_448976.1			MIDDLE
35	Med4	Dictyostelium discoideum	XP_629520.1			MIDDLE
36	Med4	Drosophila melanogaster	NP_648094.1			MIDDLE
37	Med4	Gallus gallus	XP_417054.1			MIDDLE
38	Med4	Homo sapiens		Q9NPJ6		MIDDLE
39	Med4	Mus musculus	BAE26554.1	Q9CQA5		MIDDLE
40	Med4	Neurospora crassa	XP_962487.1			MIDDLE
41	Med4	Saccharomyces cerevisiae	NP_014817.1	Q12343		MIDDLE
42	Med4	Saccharomyces pombe	NP_596462.1	Q9Y821		MIDDLE
43	Med5	Argia fumigata	XP_752166.1			MIDDLE
44	Med5	Ashbya gossypii	NP_987046.1			MIDDLE
45	Med5	Candida glabrata	XP_445908.1			MIDDLE
46	Med5	Kluyveromyces lactis	XP_454354.1			MIDDLE
47	Med5	Saccharomyces cerevisiae	NP_011364.1	P53114		MIDDLE
48	Med6	Argia fumigata	XP_001257688.1			HEAD
49	Med6	Arabidopsis thaliana	NP_188772.2			HEAD
50	Med6	Bos taurus	NP_001029409.1	Q3SZY9		HEAD
51	Med6	Candida albicans	XP_716085.1			HEAD
52	Med6	Caenorhabditis elegans	NP_504791.3			HEAD
53	Med6	Canis familiaris	XP_547885.2			HEAD
54	Med6	Cryptosporidium parvum	XP_626189.1			HEAD
55	Med6	Dictyostelium discoideum			[21]	HEAD
56	Med6	Drosophila melanogaster	NP_731403.2			HEAD
57	Med6	Gallus gallus	XP_423945.2			HEAD
58	Med6	Homo sapiens	AAC26869.1			HEAD
59	Med6	Mus musculus	EDL02719.1			HEAD
60	Med6	Neurospora crassa	XP_961198.1			HEAD
61	Med6	Oryza sativa	NP_001057150.1			HEAD
62	Med6	Pan troglodytes	XP_510038.1			HEAD
63	Med6	Rattus norvegicus	XP_216759.2			HEAD
64	Med6	Saccharomyces cerevisiae	NP_011925.1	P38782		HEAD
65	Med6	Saccharomyces pombe	NP_593503.1	Q9US45		HEAD
66	Med6	Strongylocentrotus purpuratus	XP_787850.1			HEAD
67	Med7	Argia fumigata			[21]	MIDDLE
68	Med7	Arabidopsis thaliana	NP_195942.1			MIDDLE
69	Med7	Bos taurus	XP_001252126.1			MIDDLE
70	Med7	Candida albicans	XP_719931.1			MIDDLE
71	Med7	Caenorhabditis elegans	NP_493585.1			MIDDLE
72	Med7	Canis familiaris	XP_536456.2			MIDDLE
73	Med7	Dictyostelium discoideum	XP_646076.1			MIDDLE
74	Med7	Drosophila melanogaster	ABK57063.1			MIDDLE
75	Med7	Homo sapiens	CAH92001.1	O43513		MIDDLE
76	Med7	Mus musculus	NP_079702.2			MIDDLE
77	Med7	Neurospora crassa			[21]	MIDDLE
78	Med7	Pan troglodytes	NP_004261.1	O43513		MIDDLE
79	Med7	Saccharomyces cerevisiae	NP_014506.1	Q08278		MIDDLE
80	Med7	Saccharomyces pombe	NP_596734.1	O60104		MIDDLE
81	Med8	Argia fumigata	XP_751989.1			HEAD
82	Med8	Arabidopsis thaliana	AAC32925.1			HEAD
83	Med8	Bos taurus	XP_342895.2	Q9D7W5		HEAD
84	Med8	Candida albicans	XP_712891.1			HEAD
85	Med8	Caenorhabditis elegans	NP_496463.2			HEAD
86	Med8	Canis familiaris	XP_853421.1			HEAD
87	Med8	Dictyostelium discoideum	XP_628953.1			HEAD
88	Med8	Drosophila melanogaster	NP_722456.1			HEAD
89	Med8	Gallus gallus	XP_422404.1			HEAD
90	Med8	Homo sapiens	NP_064384.2	Q9D7W5		HEAD
91	Med8	Mus musculus	BAA95113.1			HEAD
92	Med8	Neurospora crassa	XP_965268.1			HEAD
93	Med8	Rattus norvegicus	XP_342895.2			HEAD
94	Med8	Saccharomyces cerevisiae		P38304		HEAD
95	Med8	Saccharomyces pombe	NP_596338.1	O94646		HEAD
96	Med8	Strongylocentrotus purpuratus	XP_787347.1			HEAD
97	Med9	Caenorhabditis elegans			[21]	MIDDLE
98	Med9	Drosophila melanogaster	NP_608528.1			MIDDLE
99	Med9	Homo sapiens			[21]	MIDDLE
100	Med9	Mus musculus	NP_619616.2			MIDDLE
101	Med9	Saccharomyces cerevisiae	NP_014407.1	P33308		MIDDLE
102	Med9	Saccharomyces pombe	NP_588121.1			MIDDLE
103	Med10	Argia fumigata			[21]	MIDDLE
104	Med10	Arabidopsis thaliana	NP_564254.1			MIDDLE
105	Med10	Candida albicans	XP_716399.1			MIDDLE
106	Med10	Caenorhabditis elegans	NP_495650.1	P45966		MIDDLE
107	Med10	Candida glabrata	XP_447619.1			MIDDLE
108	Med10	Dictyostelium discoideum			[21]	MIDDLE
109	Med10	Drosophila melanogaster	AAF97815.1			MIDDLE
110	Med10	Homo sapiens	NP_115662.2			MIDDLE
111	Med10	Neurospora crassa	XP_956605.1			MIDDLE
112	Med10	Saccharomyces cerevisiae	NP_015494.1	Q06213		MIDDLE
113	Med10	Saccharomyces pombe	NP_596571.1	P87310		MIDDLE
114	Med11	Arabidopsis thaliana	NP_568973.1			HEAD
115	Med11	Candida albicans	XP_712481.1			HEAD
116	Med11	Drosophila melanogaster	NP_612046.1			HEAD
117	Med11	Homo sapiens	NP_542382.1	Q96HR3		HEAD
118	Med11	Saccharomyces cerevisiae	NP_013830.1	Q99278		HEAD
119	Med11	Saccharomyces pombe	NP_594444.1	O42852		HEAD
120	Med12	Argia fumigata			[21]	CDK
121	Med12	Arabidopsis thaliana	AAF02800.1			CDK
122	Med12	Bos taurus	XP_599229.2			CDK
123	Med12	Candida albicans			[21]	CDK
124	Med12	Caenorhabditis elegans			[21]	CDK
125	Med12	Canis familiaris	XP_857075.1			CDK
126	Med12	Dictyostelium discoideum			[21]	CDK
127	Med12	Drosophila melanogaster	NP_524786.1			CDK
128	Med12	Homo sapiens		Q93074		CDK
129	Med12	Mus musculus	NP_067496.1			CDK
130	Med12	Neurospora crassa	XP_965155.1			CDK
131	Med12	Saccharomyces cerevisiae	NP_010004.1	P25648		CDK
132	Med12	Saccharomyces pombe	NP_594066.1			CDK
133	Med12	Strongylocentrotus purpuratus	XP_792847.1			CDK
134	Med13	Argia fumigata			[21]	CDK
135	Med13	Arabidopsis thaliana			[21]	CDK
136	Med13	Bos taurus	XP_603205.2			CDK
137	Med13	Candida albicans	XP_722501.1	Q5ALX5		CDK
138	Med13	Caenorhabditis elegans			[21]	CDK
139	Med13	Canis familiaris	XP_537704.2			CDK
140	Med13	Dictyostelium discoideum	XP_640219.1			CDK
141	Med13	Drosophila melanogaster	NP_524653.1			CDK
142	Med13	Danio rero	XP_690369.1			CDK
143	Med13	Gallus gallus	XP_415317.1			CDK
144	Med13	Homo sapiens		Q9UHV7		CDK
145	Med13	Mus musculus	NP_001074400.1			CDK
146	Med13	Neurospora crassa			[21]	CDK
147	Med13	Pan troglodytes	NP_056150.1	Q71F56		CDK
148	Med13	Rattus norvegicus	NP_036858.1	Q63540		CDK
149	Med13	Saccharomyces cerevisiae	NP_010731.1	P38931		CDK
150	Med13	Saccharomyces pombe	NP_594050.1	Q9HE02		CDK
151	Med13	Strongylocentrotus purpuratus	XP_780945.1			CDK
152	Med14	Argia fumigata	XP_749747.1			TAIL
153	Med14	Arabidopsis thaliana	NP_187125.1			TAIL
154	Med14	Bos taurus	XP_607549.2			TAIL
155	Med14	Candida albicans	XP_720782.1			TAIL
156	Med14	Caenorhabditis elegans			[21]	TAIL
157	Med14	Dictyostelium discoideum	XP_635123.1			TAIL
158	Med14	Drosophila melanogaster			[21]	TAIL
159	Med14	Homo sapiens	AAG22547.1			TAIL
160	Med14	Mus musculus	AAH65072.1			TAIL
161	Med14	Neurospora crassa	XP_958321.1			TAIL
162	Med14	Pan troglodytes	XP_521013.1			TAIL
163	Med14	Saccharomyces cerevisiae	NP_013172.1	P19263		TAIL
164	Med14	Saccharomyces pombe		Q9P7Y4		TAIL
165	Med14	Strongylocentrotus purpuratus	XP_786414.1			TAIL
166	Med15	Arabidopsis thaliana	AAF86997.1			TAIL
167	Med15	Bos taurus	NP_001092645.1			TAIL
168	Med15	Candida albicans	CAA21993.1			TAIL
169	Med15	Caenorhabditis elegans	NP_741152.1			TAIL
170	Med15	Canis familiaris	XP_849892.1			TAIL
171	Med15	Dictyostelium discoideum			[21]	TAIL
172	Med15	Drosophila melanogaster	NP_608528.1			TAIL
173	Med15	Danio rero	NP_998238.1	Q7ZVN7		TAIL
174	Med15	Homo sapiens	NP_056973.2	Q96RN5		TAIL
175	Med15	Mus musculus	NP_291087.2			TAIL
176	Med15	Saccharomyces cerevisiae	NP_014591.1	P19659		TAIL
177	Med15	Saccharomyces pombe	NP_595390.2	Q9Y808		TAIL
178	Med16	Argia fumigata	XP_001481721.1		[21]	TAIL
179	Med16	Candida albicans	XP_711665.1			TAIL
180	Med16	Canis familiaris	XP_542212.2			TAIL
181	Med16	Drosophila melanogaster	NP_611650.2			TAIL
182	Med16	Gallus gallus	XP_418220.1			TAIL
183	Med16	Homo sapiens	NP_005472.2			TAIL
184	Med16	Mus musculus	NP_932775.1	Q6PGF3		TAIL
185	Med16	Neurospora crassa	XP_963710.1			TAIL
186	Med16	Saccharomyces cerevisiae	NP_014163.1	P32259		TAIL
187	Med17	Argia fumigata			[21]	HEAD
188	Med17	Arabidopsis thaliana			[21]	HEAD
189	Med17	Candida albicans			[21]	HEAD
190	Med17	Caenorhabditis elegans			[21]	HEAD
191	Med17	Dictyostelium discoideum	XP_641579.1			HEAD
192	Med17	Drosophila melanogaster	NP_650686.1			HEAD
193	Med17	Homo sapiens		Q9NVC6		HEAD
194	Med17	Mus musculus	NP_659182.1			HEAD
195	Med17	Neurospora crassa	XP_965768.1			HEAD
196	Med17	Saccharomyces cerevisiae	NP_010939.1	P32569		HEAD
197	Med17	Saccharomyces pombe	NP_596566.1			HEAD
198	Med18	Argia fumigata	XP_750576.1			HEAD
199	Med18	Arabidopsis thaliana	NP_565534.1			HEAD
200	Med18	Candida albicans	XP_714262.1			HEAD
201	Med18	Caenorhabditis elegans	NP_491869.1			HEAD
202	Med18	Candida glabrata	XP_446704.1			HEAD
203	Med18	Drosophila melanogaster	NP_569948.3			HEAD
204	Med18	Danio rero	NP_956629.1			HEAD
205	Med18	Homo sapiens	XP_513254.1			HEAD
206	Med18	Mus musculus	NP_080315.1			HEAD
207	Med18	Saccharomyces cerevisiae	NP_011618.1	P32585		HEAD
208	Med18	Saccharomyces pombe	NP_593364.1	O14198		HEAD
209	Med19	Argia fumigata			[21]	MIDDLE
210	Med19	Bos taurus	NP_001098818.1			MIDDLE
211	Med19	Candida albicans			[21]	MIDDLE
212	Med19	Caenorhabditis elegans	NP_497587.1			MIDDLE
213	Med19	Canis familiaris	XP_852656.1			MIDDLE
214	Med19	Danio rero	AAT68059.1			MIDDLE
215	Med19	Homo sapiens	NP_703151.1			MIDDLE
216	Med19	Mus musculus	AAH44207.1			MIDDLE
217	Med19	Neurospora crassa	XP_956752.1			MIDDLE
218	Med19	Rattus norvegicus	NP_001101211.1			MIDDLE
219	Med19	Saccharomyces cerevisiae	NP_009459.1	P25046		MIDDLE
220	Med19	Saccharomyces pombe	NP_588304.1	Q9Y7N2		MIDDLE
221	Med20	Argia fumigata			[21]	HEAD
222	Med20	Arabidopsis thaliana	NP_192646.1			HEAD
223	Med20	Candida albicans			[21]	HEAD
224	Med20	Caenorhabditis elegans	NP_500050.1			HEAD
225	Med20	Dictyostelium discoideum			[21]	HEAD
226	Med20	Drosophila melanogaster	NP_524663.2	P91641		HEAD
227	Med20	Homo sapiens	AAD16169.1			HEAD
228	Med20	Saccharomyces cerevisiae	NP_011907.1	P34162		HEAD
229	Med20	Saccharomyces pombe	NP_593728.1	Q10317		HEAD
230	Med21	Argia fumigata	XP_755668.1			MIDDLE
231	Med21	Arabidopsis thaliana	AAD03443.1			MIDDLE
232	Med21	Bos taurus	NP_001033655.1			MIDDLE
233	Med21	Candida albicans	XP_719310.1			MIDDLE
234	Med21	Caenorhabditis elegans	NP_001021184.1			MIDDLE
235	Med21	Canis familiaris	XP_852318.1	Q13503		MIDDLE
236	Med21	Candida glabrata	XP_448191.1			MIDDLE
237	Med21	Dictyostelium discoideum	----			MIDDLE
238	Med21	Drosophila melanogaster	NP_001015223.1			MIDDLE
239	Med21	Danio rero	NP_998588.1			MIDDLE
240	Med21	Gallus gallus	XP_416442.2			MIDDLE
241	Med21	Homo sapiens	NP_004255.2	Q13503		MIDDLE
242	Med21	Mus musculus	EDL10711.1			MIDDLE
243	Med21	Neurospora crassa	XP_961828.1			MIDDLE
244	Med21	Oryza sativa	BAD03057.1			MIDDLE
245	Med21	Pan troglodytes	XP_520809.1	Q13503		MIDDLE
246	Med21	Rattus norvegicus	XP_232531.1			MIDDLE
247	Med21	Sb	AAL73528.1			MIDDLE
248	Med21	Saccharomyces cerevisiae	NP_010594.1	P47822		MIDDLE
249	Med21	Saccharomyces pombe	NP_596630.1	O94376		MIDDLE
250	Med21	Strongylocentrotus purpuratus	XP_796120.1			MIDDLE
251	Med22	Argia fumigata			[21]	HEAD
252	Med22	Arabidopsis thaliana	NP_563997.1			HEAD
253	Med22	Candida albicans	XP_718409.1			HEAD
254	Med22	Caenorhabditis elegans	NP_496216.1	Q23679		HEAD
255	Med22	Dictyostelium discoideum	XP_641857.1			HEAD
256	Med22	Drosophila melanogaster	NP_569870.1			HEAD
257	Med22	Homo sapiens	NP_598395.1	Q15528		HEAD
258	Med22	Neurospora crassa	XP_959042.1			HEAD
259	Med22	Saccharomyces cerevisiae	NP_009812.1	P32570		HEAD
260	Med22	Saccharomyces pombe	NP_594875.1	O14010		HEAD
261	Med23	Bos taurus	XP_591317.3			UA
262	Med23	Drosophila melanogaster	NP_611735.1	Q9W1X7		UA
263	Med23	Caenorhabditis elegans	NP_493575.2	Q10669		UA
264	Med23	Canis familiaris	XP_532052.2			UA
265	Med23	Gallus gallus	XP_424537.1			UA
266	Med23	Homo sapiens		Q9ULK4		UA
267	Med23	Mus musculus	AAM28897.1			UA
268	Med23	Rattus norvegicus	NP_001009693.1	Q5M7V8		UA
269	Med23	Strongylocentrotus purpuratus	XP_783525.2			UA
270	Med23	Xenopus laevis	AAH41220.1			UA
271	Med24	Bos taurus	XP_580760.2			UA
272	Med24	Canis familiaris	XP_851230.1			UA
273	Med24	Drosophila melanogaster	NP_648185.1			UA
274	Med24	Gallus gallus	NP_001026534.1			UA
275	Med24	Homo sapiens	NP_055630.2			UA
276	Med24	Mus musculus	AAD42776.1			UA
277	Med24	Strongylocentrotus purpuratus	XP_001198772.1			UA
278	Med26	Drosophila melanogaster	NP_651936.1			MIDDLE
279	Med26	Danio rero	AAK61395.1			MIDDLE
280	Med26	Homo sapiens		O95402		MIDDLE
281	Med26	Xenopus laevis	NP_001083898.1			MIDDLE
282	Med28	Drosophila melanogaster	NP_651397.1	Q9VBQ9		HEAD
283	Med28	Homo sapiens	XP_517120.2	Q9H204		HEAD
284	Med28	Rattus norvegicus	XP_223463.2	P68943		HEAD
285	Med28	Strongylocentrotus purpuratus	XP_786267.1			HEAD
286	Med30	Bos taurus	XP_001251779.1			HEAD
287	Med30	Canis familiaris	XP_539144.2			HEAD
288	Med30	Drosophila melanogaster		Q9W0P3		HEAD
289	Med30	Gallus gallus	XP_418397.1			HEAD
290	Med30	Homo sapiens	NP_542382.1	Q96HR3		HEAD
291	Med30	Mus musculus		Q9CQI9		HEAD
292	Med30	Pan troglodytes	XP_528219.1			HEAD
293	Med30	Rattus norvegicus	XP_001065742.1			HEAD
294	Med30	Strongylocentrotus purpuratus	XP_790489.1			HEAD
295	Med31	Argia fumigata			[21]	MIDDLE
296	Med31	Arabidopsis thaliana	NP_197491.2	Q8VYB1		MIDDLE
297	Med31	Bos taurus		Q9CXU1		MIDDLE
298	Med31	Candida albicans	XP_711556.1			MIDDLE
299	Med31	Caenorhabditis elegans	NP_492413.1	P91869		MIDDLE
300	Med31	Canis familiaris	XP_848597.1			MIDDLE
301	Med31	Candida glabrata	XP_447266.1			MIDDLE
302	Med31	Candida lipolytica	XP_502213.1			MIDDLE
303	Med31	Cryptosporidium parvum	XP_626881.1			MIDDLE
304	Med31	Dictyostelium discoideum	XP_638330.1			MIDDLE
305	Med31	Drosophila melanogaster	NP_649483.1	Q8IH24		MIDDLE
306	Med31	Danio rero	NP_001002417.1			MIDDLE
307	Med31	Entamoeba histolytica	XP_649260.1			MIDDLE
308	Med31	Gallus gallus	XP_415924.1			MIDDLE
309	Med31	Homo sapiens		Q9Y3C7		MIDDLE
310	Med31	Mus musculus		Q9CXU1		MIDDLE
311	Med31	Neurospora crassa	XP_964730.1			MIDDLE
312	Med31	Oryza sativa	NP_001058961.1			MIDDLE
313	Med31	Rattus norvegicus	EDR05096.1			MIDDLE
314	Med31	Saccharomyces cerevisiae	NP_011388.1	P38633		MIDDLE
315	Med31	Saccharomyces pombe	NP_587859.1	Q9USH1		MIDDLE
316	Med31	Strongylocentrotus purpuratus	XP_794567.1			MIDDLE
317	Med31	Torulaspora hansenii	XP_458080.1			MIDDLE
318	Cdk8	Argia fumigata			[21]	CDK
319	Cdk8	Arabidopsis thaliana	NP_201166.1	Q84TI6		CDK
320	Cdk8	Candida albicans	XP_721039.1			CDK
321	Cdk8	Caenorhabditis elegans			[21]	CDK
322	Cdk8	Dictyostelium discoideum	XP_647600.1			CDK
323	Cdk8	Drosophila melanogaster			[21]	CDK
324	Cdk8	Danio rero	NP_919389.1			CDK
325	Cdk8	Homo sapiens	AAH69634.1			CDK
326	Cdk8	Kluyveromyces lactis	Candida albicansD58722.1			CDK
327	Cdk8	Mus musculus	NP_705827.2	Q8R3L8		CDK
328	Cdk8	Neurospora crassa	XP_957397.1			CDK
329	Cdk8	Saccharomyces cerevisiae	AAC13785.1	P39073		CDK
330	Cdk8	Saccharomyces pombe	NP_593389.1	O13958		CDK
331	CycC	Argia fumigata			[21]	CDK
332	CycC	Arabidopsis thaliana	NP_199674.1	Q9FJK7		CDK
333	CycC	Candida albicans	XP_716596.1			CDK
334	CycC	Caenorhabditis elegans			[21]	CDK
335	CycC	Dictyostelium discoideum	XP_644320.1			CDK
336	CycC	Drosophila melanogaster	NP_476848.1	P25008		CDK
337	CycC	Homo sapiens	XP_419818.2	P24863		CDK
338	CycC	Neurospora crassa	XP_956200.1			CDK
339	CycC	Saccharomyces cerevisiae	NP_014373.1	P47821		CDK
340	CycC	Saccharomyces pombe	NP_595953.1	O94503		CDK
